# Supplementary material
Source: publisher figshare collection journal article supplement (https://sage.figshare.com/ndownloader/files/14080754)
Supplement: Supplementary file 1 [file 14080754]

## Supplementary Methods

**MRI acquisition.** Using a 3.0 Tesla scanner (Philips Medical Systems, Eindhoven, the Netherlands), the following brain images were obtained: a) dual-echo turbo spin echo (TSE) (repetition time [TR]/echo time [TE]=2599/16,80 ms, echo train length=6, 44 contiguous 3-mm-thick axial slices with a matrix size=256×256, FOV=240 mm<sup>2</sup>); b) 3D T1-weighted fast field echo (TR/TE=25/4.6 ms; flip angle=30°; matrix size=256×256; FOV=230×230 mm<sup>2</sup>; 220 contiguous, axial slices with voxel size=0.89×0.89×0.8 mm; and c) pulsed-gradient SE echo-planar (EP) (TE/TR=58/8775 ms, acquisition matrix size=112×88, FOV=240×231 mm<sup>2</sup>, 55 contiguous, 2.3 mm thick axial slices) with SENSE (acceleration factor=2) and diffusion gradients applied in 35 non-collinear directions. Two optimized b factors were used for acquiring diffusion weighted images (b1=0, b2=900 s/mm<sup>2</sup>). For all scans, the slices were positioned to run parallel to a line that joins the most infero-anterior and infero-posterior margins of the corpus callosum.

**Lesion distribution.** 2D histograms were produced for each patient having the ratio of the number of transected fibers per fiber bundle on the y axis and one of the following metrics on the x axis: average fractional anisotropy (FA), average length of fibers and average number of fibers. Histograms were averaged for the whole group of multiple sclerosis (MS) patients and for each disease clinical phenotype. Moreover, the transection ratio was calculated for the 116 nodes of the network and averaged within macro-areas; the following macro-areas were considered based on anatomical criteria: frontal, temporal, limbic, occipital, parietal, deep GM nuclei and cerebellar (supplementary Table 1). Using a one-way ANOVA model, comparisons between clinical phenotypes were assessed.

**Cross validation.** The dataset was subsampled 100 times, extracting 75 patients and 35 healthy controls. Each time, subject selection was accomplished using a pseudo random generator. Any constraint was used to keep the proportion of MS clinical phenotypes constant, although in all cases there was a good approximation of the original distribution. The same statistical tests were applied as for the original data set, to assess between-group comparisons of global network metrics and

correlations with clinical scores. The percentage of significant results was then calculated over the 100 subsamples tested, limiting cross-validation to global metrics.

## **Supplementary Results**

Distribution of transected fiber bundles: 2D histograms. Supplementary Fig. 1 shows 2D histograms of the dependence of transection on FA (A), fiber length (B) and number of fibers per fiber bundle (C). The majority of transected fiber bundles are in histogram bins within the following ranges: FA=0.4-0.45, length=150-165 mm and number of fibers=5-30; in these bins, an a posteriori statistical analysis (ANOVA model) found significant differences between relapsing remitting (RR) MS and both benign MS and secondary progressive (SP) MS patients and no differences between SPMS and benign MS patients (Supplementary Table 2). Although the degree of transection ranged from 0 to 1, the vast majority of fiber tracts showed either no disconnection or complete disconnection.

Transection affecting nodes. Moving from RRMS to benign and SPMS, transection ratio increased in all nodes in a similar way. The most affected nodes, common to all MS clinical phenotypes, were the superior occipital gyri, paracentral lobules, right (R) superior parietal lobule, left (L) caudate nucleus, L and R thalamus, R middle temporal gyrus and L cuneus (Supplementary Fig. 2). The average transection ratio in nodes classified according to macro-area membership was highest for deep gray matter nuclei, high for the occipital, parietal and temporal regions, medium for the frontal regions and low for the limbic system and cerebellum. This behavior was similar for all MS clinical phenotypes. Statistical analysis revealed that the average nodal transection ratio in each macro-area was always significantly different between RRMS and SPMS patients and for the majority of macro-areas between RRMS and benign MS patients. No difference was found between SPMS and benign MS patients, except for the cerebellum (Supplementary Table 3).

Cross validation. The percentage of significant results over the 100 subsamples tested, are the followings for the between group comparisons:

|                             |                                               |
|-----------------------------|-----------------------------------------------|
| Mean Strength:              | RRvsHC 100%, SPvsRR 68%, BvsRR 33%, SPvsB 3%  |
| Transitivity:               | RRvsHC 100%, SPvsRR 66%, BvsRR 33%, SPvsB 3%, |
| Global efficiency:          | RRvsHC 100%, SPvsRR 68%, BvsRR 32%, SPvsB 3%, |
| Assortativity:              | RRvsHC 100%, SPvsRR 6%, BvsRR 3%, SPvsB 0%,   |
| Characteristic path length: | RRvsHC 94%, SPvsRR 69%, BvsRR 20%, SPvsB 9%,  |

These are the results after modelling of disconnection:

|                             |                                                |
|-----------------------------|------------------------------------------------|
| Mean Strength:              | RRvsHC 100%, SPvsRR 84%, BvsRR 39%, SPvsB 6%,  |
| Transitivity:               | RRvsHC 100%, SPvsRR 85%, BvsRR 36%, SPvsB 3%,  |
| Global efficiency:          | RRvsHC 100%, SPvsRR 81%, BvsRR 34%, SPvsB 5%,  |
| Assortativity:              | RRvsHC 0%, SPvsRR 52%, BvsRR 11%, SPvsB 7%,    |
| Characteristic path length: | RRvsHC 100%, SPvsRR 81%, BvsRR 20%, SPvsB 14%, |

These results suggest that reducing the sample size to one third implies that the only comparison that is still robustly found is between RRMS and HC. The modelling of disconnection slightly improved the percentage of significant results. Assortativity was confirmed as the test that changed behaviour after disconnection.

It was confirmed that correlations with GM atrophy are strong. Disease duration was often a significant factor (on average 70% of times found), whereas EDSS, PASAT and WM atrophy were significant in less than 50 percent of the subsamples. The modelling of disconnection did not change these results.

**Supplementary Table 1.** Brain nodes of the network based on the AAL atlas. Odd label numbers refer to the left hemisphere, and the even numbers to the right hemisphere. The column indicating the membership of macro-areas was assigned using anatomical criteria.

| AAL label number | AAL label name   | Anatomical region                         | Macro-area | AAL label number | AAL label name | Anatomical region         | Macro-area | AAL label number | Aal Label Name    | Anatomical region                     | Macro-area |
|------------------|------------------|-------------------------------------------|------------|------------------|----------------|---------------------------|------------|------------------|-------------------|---------------------------------------|------------|
| 1; 2             | Precentral       | Precentral gyrus                          | Frontal    | 43; 44           | Calcarine      | Calcarine sulcus          | Occ        | 85; 86           | Temporal_Mid      | Middle temporal gyrus                 | Temp       |
| 3; 4             | Frontal_Sup      | Superior frontal gyrus                    | Frontal    | 45; 46           | Cuneus         | Cuneus                    | Occ        | 87; 88           | Temporal_Pole_Mid | Middle temporal pole                  | Temp       |
| 5; 6             | Frontal_Sup_Orb  | Superior frontal gyrus, orbital part      | Frontal    | 47; 48           | Lingual        | Lingual gyrus             | Occ        | 89; 90           | Temporal_Inf      | Inferior temporal gyrus               | Temp       |
| 7; 8             | Frontal_Mid      | Middle frontal gyrus                      | Frontal    | 49; 50           | Occipital_Sup  | Superior occipital gyrus  | Occ        | 91; 92           | Cerebelum_Crus1   | Crus i of cerebellar hemisphere       | Cereb      |
| 9; 10            | Frontal_Mid_Orb  | Middle frontal gyrus, orbital part        | Frontal    | 51; 52           | Occipital_Mid  | Middle occipital gyrus    | Occ        | 93; 94           | Cerebelum_Crus2   | Crus ii of cerebellar hemisphere      | Cereb      |
| 11; 12           | Frontal_Inf_Oper | Inferior frontal gyrus, pars opercularis  | Frontal    | 53; 54           | Occipital_Inf  | Inferior occipital cortex | Occ        | 95; 96           | Cerebelum_3       | Lobule iii of cerebellar hemisphere   | Cereb      |
| 13; 14           | Frontal_Inf_Tri  | Inferior frontal gyrus, pars triangularis | Frontal    | 55; 56           | Fusiform       | Fusiform gyrus            | Occ        | 97; 98           | Cerebelum_4_5     | Lobule iv, v of cerebellar hemisphere | Cereb      |
| 15; 16           | Frontal_Inf_Orb  | Inferior frontal gyrus, pars orbitalis    | Frontal    | 57; 58           | Postcentral    | Postcentral gyrus         | Parietal   | 99; 100          | Cerebelum_6       | Lobule vi of cerebellar hemisphere    | Cereb      |
| 17; 18           | Rolandic_Oper    | Rolandic operculum                        | Frontal    | 59; 60           | Parietal_Sup   | Superior parietal lobule  | Parietal   | 101; 102         | Cerebelum_7b      | Lobule viib of cerebellar             | Cereb      |

|        |                        |                             |         |        |                    |                            |          |          |              |                                      |       |
|--------|------------------------|-----------------------------|---------|--------|--------------------|----------------------------|----------|----------|--------------|--------------------------------------|-------|
|        |                        |                             |         |        |                    |                            |          |          |              | hemisphere                           |       |
| 19; 20 | Supp_Motor_Area        | Supplementary motor area    | Frontal | 61; 62 | Parietal_Inf       | Inferior parietal lobule   | Parietal | 103; 104 | Cerebelum_8  | Lobule viii of cerebellar hemisphere | Cereb |
| 21; 22 | Olfactory              | Olfactory cortex            | Frontal | 63; 64 | Supramarginal      | <i>Supramarginal gyrus</i> | Parietal | 105; 106 | Cerebelum_9  | Lobule ix of cerebellar hemisphere   | Cereb |
| 23; 24 | Frontal_Sup_Media<br>1 | Medial frontal gyrus        | Frontal | 65; 66 | Angular            | Angular gyrus              | Parietal | 107; 108 | Cerebelum_10 | Lobule x of cerebellar hemisphere    | Cereb |
| 25; 26 | Frontal_Mid_Orb        | Medial orbitofrontal cortex | Frontal | 67; 68 | Precuneus          | Precuneus                  | Parietal | 109      | Vermis_1_2   | Lobule i, ii of vermis               | Cereb |
| 27; 28 | Rectus                 | Gyrus rectus                | Frontal | 69; 70 | Paracentral_Lobule | Paracentral lobule         | Parietal | 110      | Vermis_3     | Lobule iii of vermis                 | Cereb |
| 29; 30 | Insula                 | Insula                      | Temp    | 71; 72 | Caudate            | Caudate nucleus            | DGM      | 111      | Vermis_4_5   | Lobule iv, v of vermis               | Cereb |
| 31; 32 | Cingulum_Ant           | Anterior cingulate gyrus    | Limbic  | 73; 74 | Putamen            | Putamen                    | DGM      | 112      | Vermis_6     | Lobule vi of vermis                  | Cereb |
| 33; 34 | Cingulum_Mid           | Midcingulate area           | Limbic  | 75; 76 | Pallidum           | Globus pallidus            | DGM      | 113      | Vermis_7     | Lobule vii of vermis                 | Cereb |
| 35; 36 | Cingulum_Post          | Posterior cingulate gyrus   | Limbic  | 77; 78 | Thalamus           | Thalamus                   | DGM      | 114      | Vermis_8     | Lobule viii of vermis                | Cereb |
| 37; 38 | Hippocampus            | Hippocampus                 | Limbic  | 79; 80 | Heschl             | Transverse temporal gyrus  | Temp     | 115      | Vermis_9     | Lobule ix of vermis                  | Cereb |
| 39; 40 | Parahippocampal        | Parahippocampal gyrus       | Limbic  | 81; 82 | Temporal_Sup       | Superior temporal gyrus    | Temp     | 116      | Vermis_10    | Lobule x of vermis                   | Cereb |
| 41; 42 | Amygdala               | Amygdala                    | Limbic  | 83; 84 | Temporal_Pole_Sup  | Superior temporal pole     | Temp     |          |              |                                      |       |

Abbreviations: AAL: Automated Anatomical Labeling; Temp=Temporal; Occ=Occipital; DGM=Deep Grey Matter Nuclei; Cereb=Cerebellar.

**Supplementary Table 2.** Between-group comparisons of percentage of white matter tracts studied for transection ratios of 0 and 1, and for the metrics reported in column 1. Estimated means and standard errors resulting from the fitting of a one-way ANOVA model are reported for each group.

| Tract metric      | Transection ratio | RRMS       | Benign MS  | P value* | SPMS       | P value** | P value*** |
|-------------------|-------------------|------------|------------|----------|------------|-----------|------------|
| FA=0.4-0.45       | 0                 | 8.7 (0.5)  | 5.3 (0.8)  | <0.001   | 4.6 (0.6)  | <0.001    | n.s.       |
|                   | 1                 | 5.4 (0.5)  | 8.6 (0.8)  | 0.003    | 10.1 (0.7) | <0.001    | n.s.       |
| Length=150-165 mm | 0                 | 4.3 (0.2)  | 2.9 (0.4)  | 0.005    | 2.5 (0.3)  | <0.001    | n.s.       |
|                   | 1                 | 2.0 (0.2)  | 3.3 (0.4)  | 0.008    | 4.1 (0.3)  | <0.001    | n.s.       |
| #Tracts=5-30      | 0                 | 20.2 (0.6) | 16.9 (0.9) | 0.005    | 15.3 (0.7) | <0.001    | n.s.       |
|                   | 1                 | 6.6 (0.5)  | 9.7 (0.8)  | 0.005    | 11.4 (0.7) | <0.001    | n.s.       |

P values refer to one-way ANOVA model (post-hoc comparisons with Bonferroni correction applied).

\**Benign vs RRMS*; \*\**SPMS vs RRMS*; \*\*\**SPMS vs Benign MS*.

*Abbreviations: FA=fractional anisotropy; MS=multiple sclerosis; RR=relapsing-remitting; SP=secondary progressive; n.s.=not significant.*

**Supplementary Table 3.** Between-group comparison of average nodal disconnection ratio in each macro-area. Estimated means and standard errors resulting from the fitting of a one-way ANOVA model are reported for each group.

| Macro-area              | RRMS         | Benign MS    | p value* | SPMS         | p value** | p value*** |
|-------------------------|--------------|--------------|----------|--------------|-----------|------------|
| Deep gray matter nuclei | 0.29 (0.02)  | 0.44 (0.03)  | 0.001    | 0.50 (0.03)  | <0.001    | n.s.       |
| Occipital               | 0.26 (0.02)  | 0.35 (0.03)  | 0.01     | 0.39 (0.02)  | <0.001    | n.s.       |
| Temporal                | 0.21 (0.02)  | 0.31 (0.03)  | 0.001    | 0.34 (0.02)  | <0.001    | n.s.       |
| Parietal                | 0.21 (0.02)  | 0.30 (0.03)  | 0.009    | 0.34 (0.02)  | <0.001    | n.s.       |
| Frontal                 | 0.16 (0.01)  | 0.23 (0.02)  | 0.04     | 0.29 (0.02)  | <0.001    | n.s.       |
| Limbic                  | 0.05 (0.01)  | 0.07 (0.01)  | n.s.     | 0.10 (0.01)  | <0.001    | n.s.       |
| Cerebellum              | 0.05 (0.005) | 0.06 (0.007) | n.s.     | 0.09 (0.006) | <0.001    | 0.05       |

*p*-values refer to one-way ANOVA model (post-hoc comparisons with Bonferroni correction applied).

\**Benign multiple sclerosis vs RRMS*; \*\**SPMS vs RRMS*; \*\*\**SPMS vs benign MS*.

Abbreviations: *RR*=relapsing-remitting; *SP*=secondary progressive; *n.s.*=not significant.

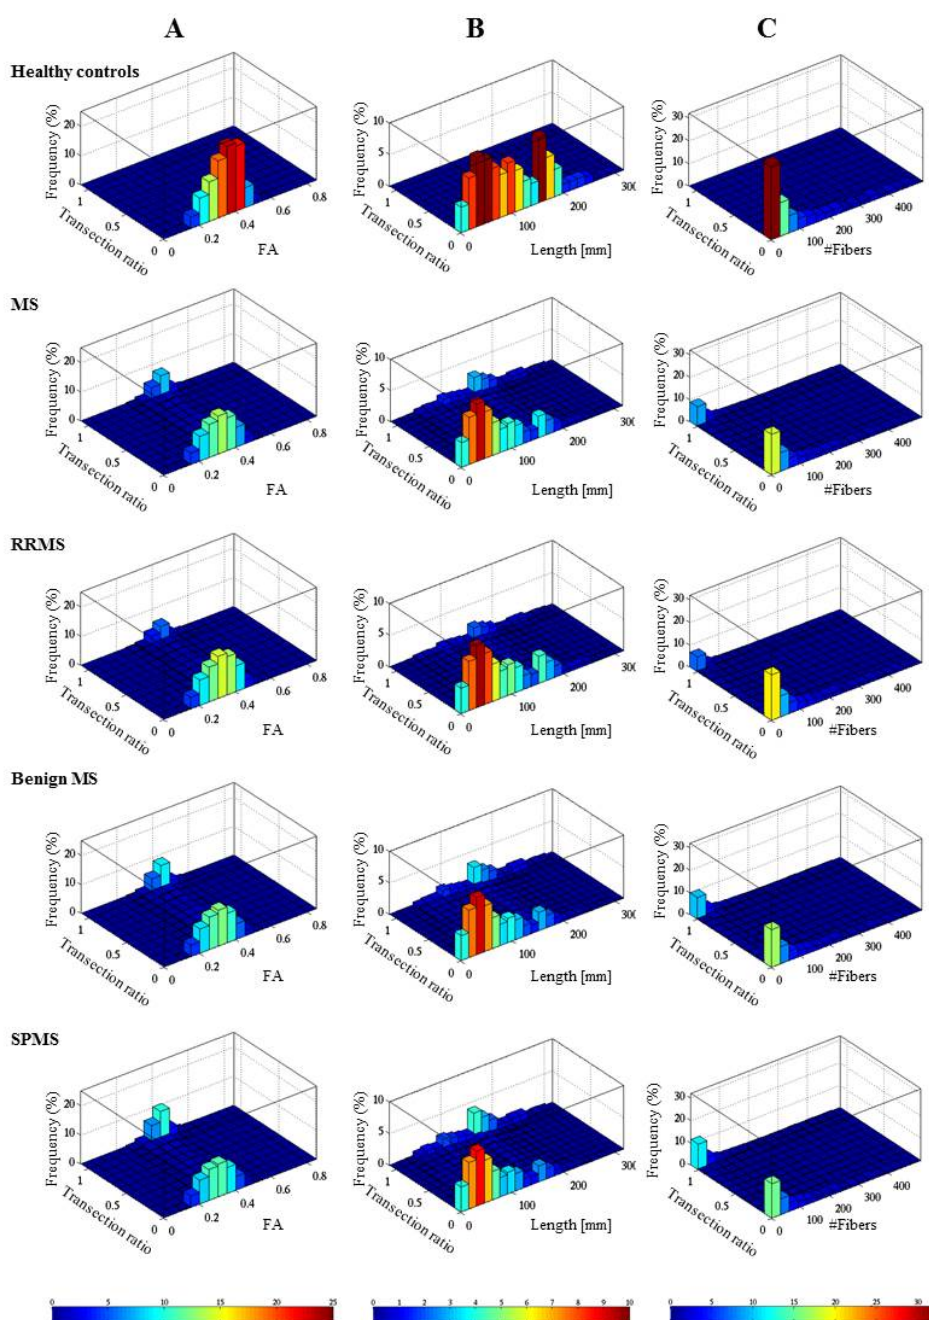

**Supplementary Figure 1. Dependence of transection ratio on white matter fiber bundle properties in the custom atlas.** The figure shows 2D histograms of the dependence of transection on FA (A), fiber length (B) and number of fibers per fiber bundle (C). The first panel of the figure shows the distributions in fiber bundles for healthy controls (HCs). In the subsequent panels, the effect of transection is shown for all MS patients, and separately for relapsing remitting (RR) MS, benign MS and secondary progressive (SP) MS patients.

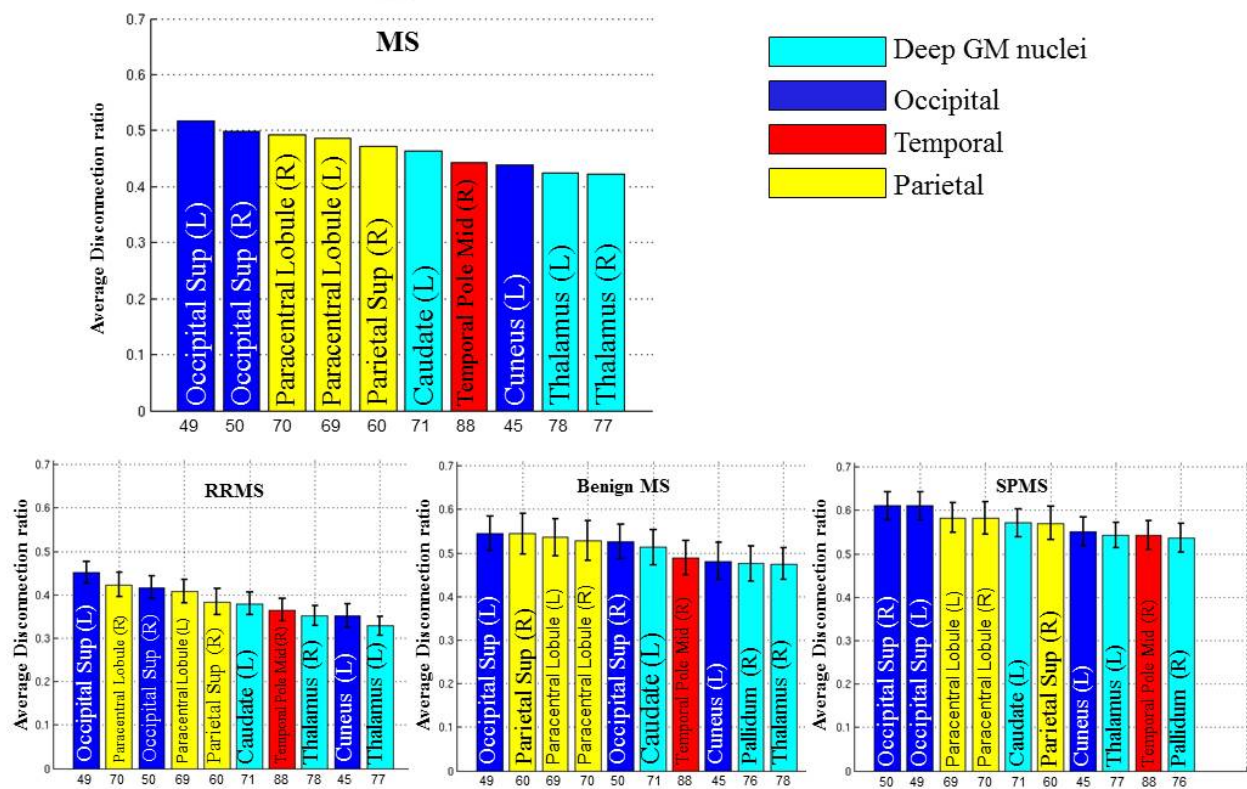

**Supplementary Figure 2. First 10 nodes with the highest average transection ratios.** Average values and standard errors are reported. Bars are colored according to macro-area membership. Nodes are identified using the AAL labels described in Supplementary Table 1. Abbreviations: RR=relapsing-remitting; SP=secondary progressive; MS=multiple sclerosis.
